# Supplementary material for: The Role of Imaging in Cervical Cancer Staging: ESGO/ESTRO/ESP Guidelines (Update 2023)
Source: MDPI journal article supplement (doi:10.3390/cancers16040775), 2024-02-14
Supplement: s1 [file s1]

| Study and publication year   | Local staging (Yes/No) | LN staging (Yes/No) | Imaging modality                                  | Tot n° studies | Outcomes (pooled sensitivity [specificity]%)                                                                                                                                                                                                                  | Weakness of the study                                                                                                                                |
|------------------------------|------------------------|---------------------|---------------------------------------------------|----------------|---------------------------------------------------------------------------------------------------------------------------------------------------------------------------------------------------------------------------------------------------------------|------------------------------------------------------------------------------------------------------------------------------------------------------|
| <i>Choi et al., 2010[84]</i> | No                     | Yes                 | Conventional MRI, CT, PET/PET-CT                  | 41             | Assessing lymph node metastasis (patient-based):<br>PET/PET-CT 82 [81]<br>MRI 56 [71]<br>CT 50 [92]<br><br>Assessing lymph node metastasis (region/node-based):<br>PET/PET-CT 54 [97]<br>CT 52 [92]<br>MRI 38 [97]                                            | Articles selected from 1981<br><br>Does not categorize early vs LACC<br><br>Nodal regions subgroup analysis not performed                            |
| <i>Kang et al., 2010[86]</i> | No                     | Yes                 | PET/CT                                            | 10             | Assessing lymph node metastasis:<br>34 [97]                                                                                                                                                                                                                   | Does not categorize early vs LACC<br><br>Large heterogeneity of studies                                                                              |
| <i>Shen et al., 2015[78]</i> | No                     | Yes                 | DWI                                               | 15             | Assessing lymph node metastasis:<br>86 [84]                                                                                                                                                                                                                   | Paraortic LN only<br>Most of study designs not documented<br><br>Reference standard not always met (histopathology)<br><br>Pelvic LN only            |
| <i>Liu et al., 2017[92]</i>  | No                     | Yes                 | Conventional MRI, DWI, CT, PET/PET-CT             | 67             | Assessing lymph node metastasis:<br>DWI 87 [83]<br>PET/PET-CT 66 [97]<br>CT 57 [91]<br>MRI 54 [93]<br><br>Paraortic LN:<br>PET/PET-CT 81[98]<br>CT 68[90]<br>MRI 54[94]<br>DWI NA<br><br>Pelvic LN:<br>PET/PET-CT 55[97]<br>CT 48[91]<br>MRI 62[93]<br>DWI NA | Study selection from 1981<br><br>Technological features insufficiently detailed                                                                      |
| <i>Gong et al. 2017[96]</i>  | No                     | Yes                 | Pelvic conventional MRI, DWI, CT, PET, PET-CT, US | 80             | Assessing lymph node metastasis:<br>DWI 84 [95]<br>US 71 [99]<br>PET-CT 68 [97]<br>PET 56 [97]<br>MRI 50 [95]<br>CT 47 [93]                                                                                                                                   | Article selected from 1981<br><br>Different gynaecological cancers considered, not cervical exclusive<br><br>Majority of studies being retrospective |

|                              |     |     |                                       |    |                                                                                                           |                                                         |
|------------------------------|-----|-----|---------------------------------------|----|-----------------------------------------------------------------------------------------------------------|---------------------------------------------------------|
| <i>Woo et al.,2018[95]</i>   | Yes | No  | Pelvic conventional MRI, DWI          | 14 | Assessing parametrial involvement:<br>DWI 82 [94]<br>MRI 72[91]                                           | Majority of studies focusing only on pelvic LN          |
|                              |     |     |                                       |    |                                                                                                           | Nodal regions subgroup analysis not performed           |
| <i>Luo et al.,2018[108]</i>  | No  | Yes | Pelvic conventional MRI, DWI, CT, PET | 16 | Assessing lymph node metastasis<br>MRI 54[92]<br>PET 50 [96]<br>CT 44 [93]<br>DWI NA*                     | Reference standard not always met (histopathology)      |
|                              |     |     |                                       |    |                                                                                                           | Does not categorize early vs LACC                       |
| <i>Ruan et al., 2018[93]</i> | No  | Yes | PET/CT                                | 27 | Assessing lymph node metastasis:<br>72 [96]<br><br>Paraaortic LN:<br>76 [96]<br><br>Pelvic LN:<br>85 [76] | Different MRI technology (1T;1,5T; 3T)                  |
|                              |     |     |                                       |    |                                                                                                           | Majority of studies being retrospective                 |
| <i>Yu et al., 2019[97]</i>   | No  | Yes | PET/CT                                | 14 | Assessing lymph node metastasis:<br>71 [97]                                                               | Does not categorize early vs LACC                       |
|                              |     |     |                                       |    |                                                                                                           | Nodal regions subgroup analysis not performed           |
|                              |     |     |                                       |    |                                                                                                           | Technological features insufficiently detailed          |
|                              |     |     |                                       |    |                                                                                                           | *DWI results expressed only in LHR                      |
|                              |     |     |                                       |    |                                                                                                           | Inconsistencies in criteria of interpretation of PET/CT |
|                              |     |     |                                       |    |                                                                                                           | Large heterogeneity of studies                          |
|                              |     |     |                                       |    |                                                                                                           | Majority of studies being retrospective                 |
|                              |     |     |                                       |    |                                                                                                           | Paraaortic LN only                                      |
|                              |     |     |                                       |    |                                                                                                           | Technological features insufficiently detailed          |

|                                 |     |     |                                      |     |                                                                                                                                                                                                                                                                                                                                                                                                                                                                                                                                                 |                                                                                                                                                                                     |
|---------------------------------|-----|-----|--------------------------------------|-----|-------------------------------------------------------------------------------------------------------------------------------------------------------------------------------------------------------------------------------------------------------------------------------------------------------------------------------------------------------------------------------------------------------------------------------------------------------------------------------------------------------------------------------------------------|-------------------------------------------------------------------------------------------------------------------------------------------------------------------------------------|
| <i>Woo et al.,2020[66]</i>      | Yes | Yes | Pelvic conventional MRI, CT, PET, US | 115 | <p>Assessing local disease extent:<br/>           PET 73 [91]<br/>           MRI 71 [91]<br/>           US 67 [94]<br/>           CT 43 [71]</p> <p>Assessing lymph node metastasis:<br/>           PET 57 [95]<br/>           MRI 57 [93]<br/>           CT 51 [87]<br/>           US 43 [96]</p> <p>Paraaortic LN:<br/>           PET 59 [96]<br/>           MRI 40 [91]<br/>           CT 29 [91]<br/>           US NA</p> <p>Pelvic LN:<br/>           PET 60 [93]<br/>           MRI 61 [88]<br/>           CT NA<br/>           US NA</p> | <p>Does not categorize early vs LACC</p> <p>Majority of studies being retrospective</p> <p>Technological features insufficiently detailed</p>                                       |
| <i>Alcázar et al., 2020[73]</i> | Yes | No  | Pelvic conventional MRI, US          | 9   | <p>Assessing parametrial involvement:<br/>           US 78 [96]<br/>           MRI 68 [91]</p>                                                                                                                                                                                                                                                                                                                                                                                                                                                  | <p>Articles selected from 1990</p> <p>Different MRI technologies (0,5 T; 1,5T; 3T; NA)</p> <p>Large heterogeneity of studies</p>                                                    |
| <i>Xiao et al., 2020 [65]</i>   | Yes | Yes | Conventional MRI                     | 39  | <p>Assessing the internal os involvement:<br/>           86 [97]</p> <p>Assessing the stromal invasion:<br/>           87 [91]</p> <p>Assessing lymph node metastasis:<br/>           51 [90]</p>                                                                                                                                                                                                                                                                                                                                               | <p>Articles selected from 1995</p> <p>Different MRI technologies (0,5 T; 1,5T; 3T; NA)</p> <p>Mostly based on early-stages</p> <p>Nodal regions subgroup analysis not performed</p> |
| <i>Tian et al., 2022 [85]</i>   | Yes | Yes | US                                   | 11  | <p>Assessing parametrial involvement:<br/>           62 [91]</p> <p>Assessing stromal invasion:<br/>           84 [80]</p> <p>Assessing lymph node metastasis:<br/>           52 [95]</p>                                                                                                                                                                                                                                                                                                                                                       | <p>Does not categorize early vs LACC</p> <p>Large heterogeneity of studies</p> <p>Nodal regions subgroup analysis not performed</p>                                                 |
| <i>He et al., 2022[98]</i>      | No  | Yes | Conventional MRI, PET-CT             | 11  | <p>Assessing lymph node metastasis:<br/>           PET-CT 65 [93]<br/>           MRI 58 [91]</p>                                                                                                                                                                                                                                                                                                                                                                                                                                                | Does not categorize early vs LACC                                                                                                                                                   |

|  |                                                |
|--|------------------------------------------------|
|  | Majority of studies being retrospective        |
|  | Nodal regions subgroup analysis not performed  |
|  | Technological features insufficiently detailed |

**Supplementary Table S3: Overview of meta-analyses on radiological local and nodal staging in cervical cancer**
